# Supplementary material for: Bimagnetic h-Co/h-CoO nanotetrapods: preparation, nanoscale characterization, three-dimensional architecture and their magnetic properties
Source: Royal Society of Chemistry journal article supplement (doi:10.1039/c4nr02287d), 2014-09-11
Supplement: c4nr02287d1.pdf [file c4nr02287d1.pdf]

Supporting Information

**Bimagnetic h-Co/h-CoO nanotetrapods: preparation, nanoscale  
characterization, three-dimensional architecture and their magnetic  
property**

Xia Deng,<sup>a</sup> Dezheng Yang,<sup>a</sup> Guoguo Tan,<sup>a</sup> Xinghua Li,<sup>b</sup> Junwei Zhang,<sup>a</sup> Qingfang Liu,<sup>a</sup> Haoli  
Zhang,<sup>c</sup>

Nigel J Mellors,<sup>d</sup> Desheng Xue<sup>a</sup> and Yong Peng<sup>\*a</sup>

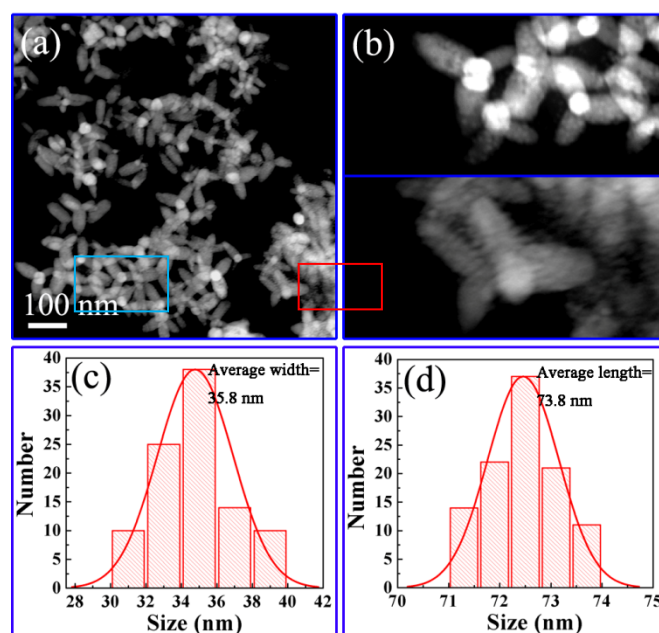

Figure S1. The low magnification TEM image (a) and its corresponding magnified TEM image (b). The quantitative analysis of the pod sizes of individual h-Co/h-CoO nanotetrapods: (c) diameter distribution, (d) length distribution.

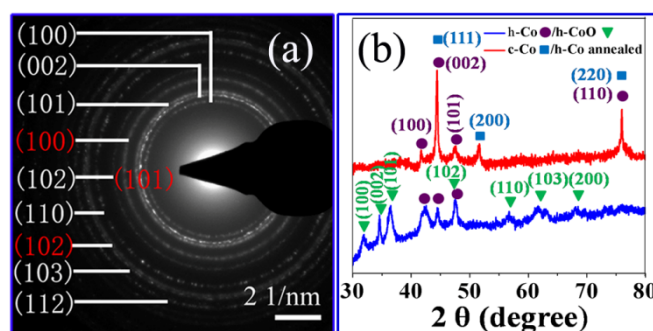

Figure S2. (a) A representative SAED pattern of tens of h-Co/h-CoO nanotetrapods. (b) XRD spectra of the prepared and annealed bimagnetic h-Co/h-CoO nanotetrapods.

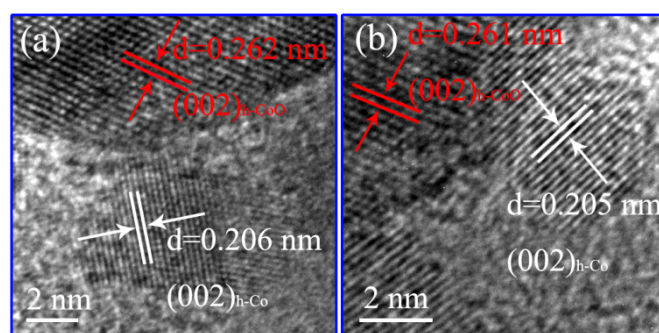

Figure S3. The HRTEM image of the decorated h-Co nanoparticles and h-CoO nanotetrapods.

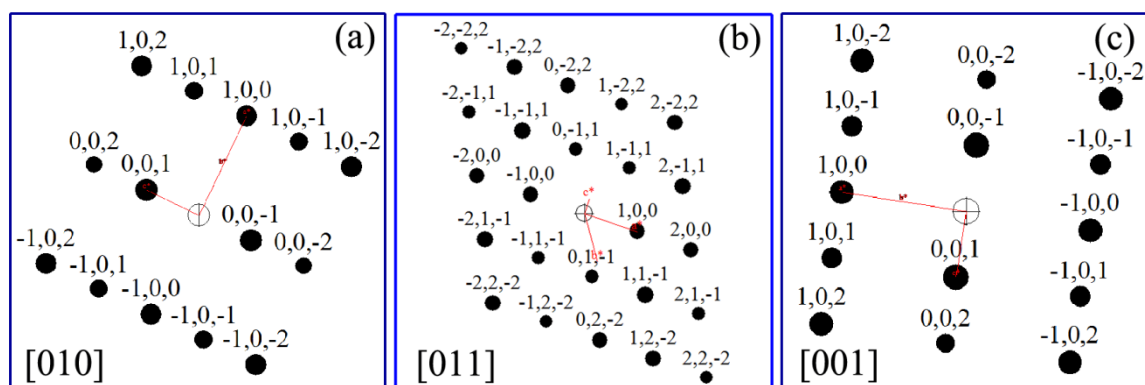

Figure S4. The simulation image of the FFT images in Figure 5g-5i.
